# Supplementary material
Source: publisher figshare collection journal article supplement (https://brill.figshare.com/articles/dataset/_/26572312)
Supplement: Supplementary file 1 [file 1]

RESEARCH ARTICLE

## **Education: an efficient tool to increase the willingness of children to consume farmed crickets in Madagascar**

*J.F. Rakotondraso<sup>1,2\*</sup>, T. Ramiadantsoa<sup>1,3</sup>, L.J. Becker<sup>4</sup>, A. Ravelomanana<sup>1,2</sup>, J. Van Itterbeeck<sup>5,6</sup>, S. Hugel<sup>4</sup> and B.L. Fisher<sup>1,7</sup>*

<sup>1</sup>Madagascar Biodiversity Center (MBC), Parc Botanique et Zoologique de Tsimbazaza, BP6257, Antananarivo 101, Madagascar; <sup>2</sup>Mention Entomologie- Culture, Elevage et Santé (E-CES), University of Antananarivo, BP 906, Antananarivo 101, Madagascar; <sup>3</sup>Department of Integrative Biology, University of Wisconsin-Madison, WI 53706, USA; <sup>4</sup>Institute of Cellular and Integrative Neuroscience, National Center of Scientific Research (CNRS), University of Strasbourg, 67000 Strasbourg, France; <sup>5</sup>Center for Asian Area Studies, Rikkyo University, 3-34-1 Nishi-Ikebukuro, Toshima, Tokyo 171-8501, Japan; <sup>6</sup>Animal Physiology and Neurobiology, 3000 Leuven, Belgium; <sup>7</sup>California Academy of Sciences, San Francisco, CA 94118, USA; \*[faniryjohanna@gmail.com](mailto:faniryjohanna@gmail.com)

**Supplementary material**
